# Supplementary material
Source: PubMed Central journal article supplement (PMC6479038)
Supplement: IAI.00878-18-s0001.pdf [file IAI.00878-18-s0001.pdf]

**SUPPLEMENTAL MATERIAL**

**Loss of trefoil factor 2 sensitizes rat pups to systemic infection with the neonatal pathogen  
*Escherichia coli* K1**

Alex J. McCarthy, George M. H. Birchenough & Peter W. Taylor

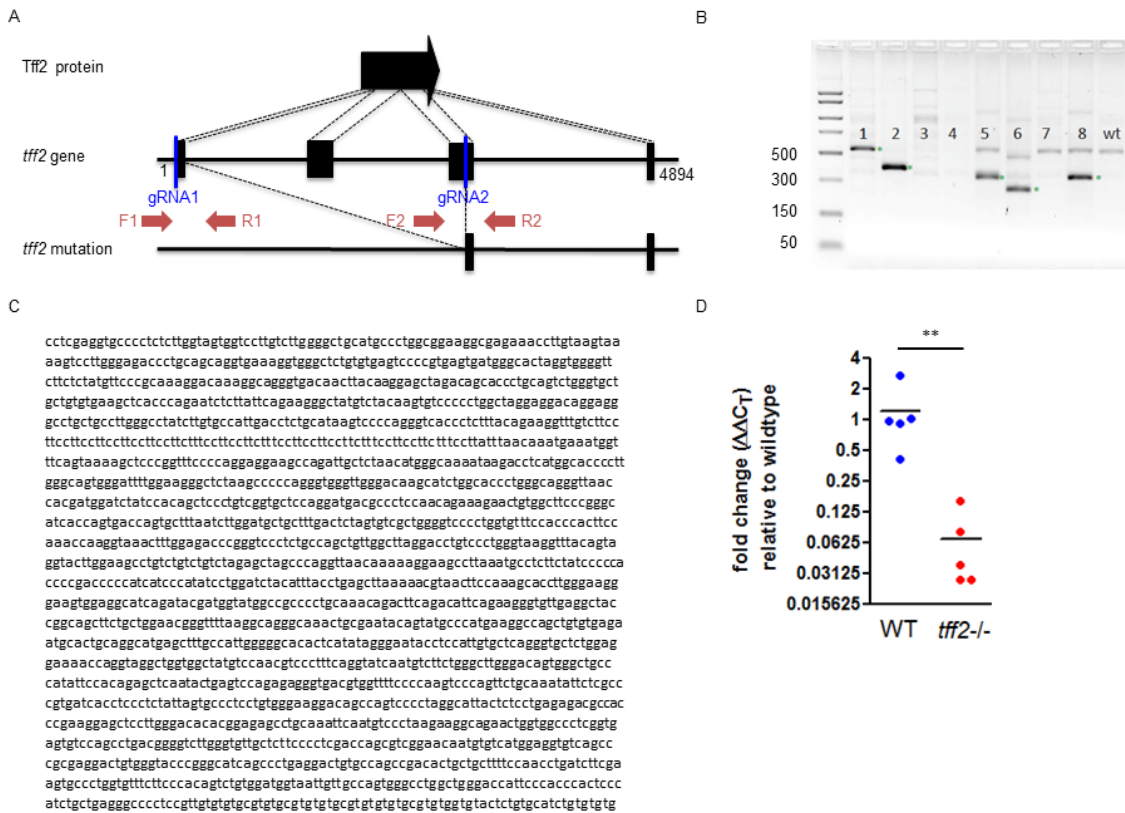

**Fig. S1. Validation of *tff2*<sup>-/-</sup> rats.** A, Design strategy for mutating the *tff2* gene. Two pairs of sgRNAs were designed to cleave together to generate a 1.8 kb deletion between the target sites. gRNA1 and gRNA2 were targeted to exon 1 and 3, respectively, of the rat *tff2* gene sequence (GenBank accession number NC\_005119). Primers flanking each gRNA1 (F1 and R1) and gRNA2 (F2 and R2) sites were designed to screen for deletion mutations between the two target sites. B, PCR amplification of the *tff2* gene identified 4 founders (founders 2, 5, 6 and 8) with desired *tff2* deletion mutations. Bands were excised and sequenced. C, Sequence of the 1933 bp deletion in founder 2. D, qRT-PCR analysis of *tff2* gene expression in stomach tissues of wildtype (WT) and *tff2*<sup>-/-</sup> Sprague-Dawley rats at P9. Data for *tff2* gene was normalized to *rspS23* gene, and data from P9 *tff2*<sup>-/-</sup> pups standardized to expression levels in P9 wildtype animals using the  $\Delta_{CT}$  method for relative quantification of qPCR data. Mean  $\pm$  SD;  $n = 5$ .  $\Delta_{CT}$  values were compared by *t* test. \*\* $P < 0.01$

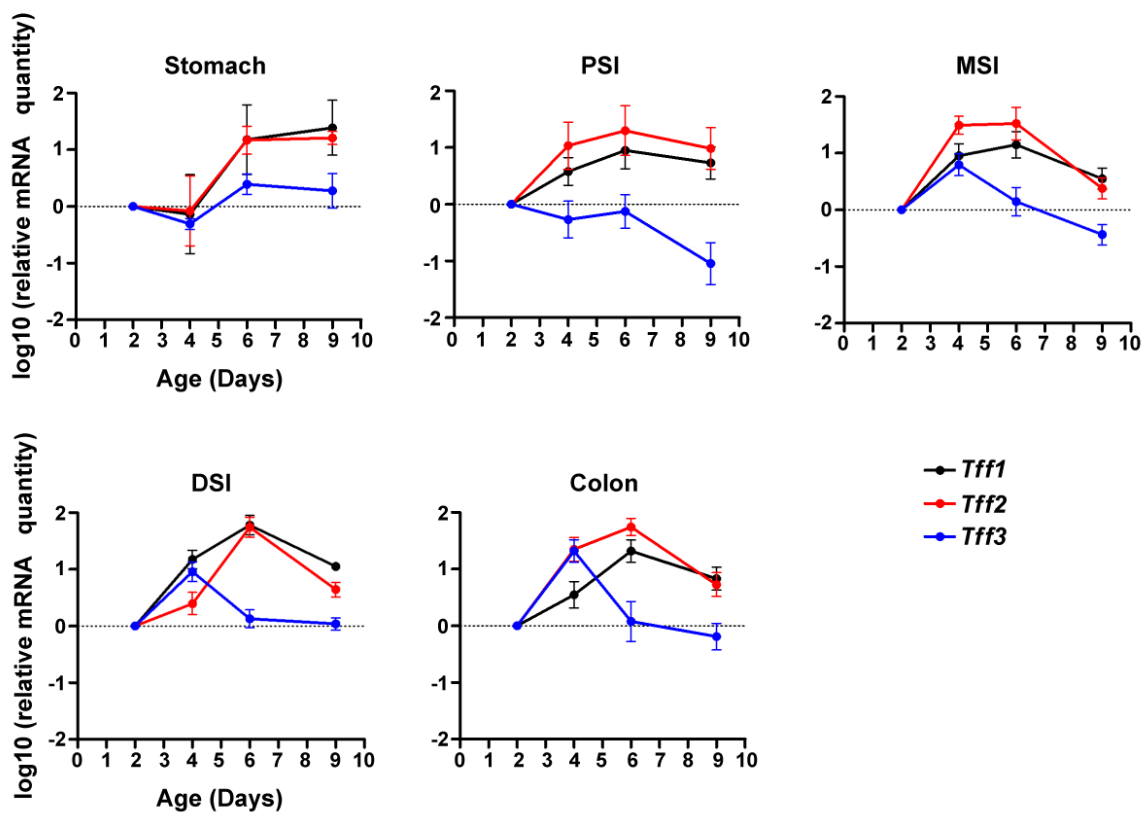

**Fig. S2. Temporal changes in trefoil factor expression in the neonatal rat gastrointestinal tract.** The normal developmental expression of *tff1*, *tff2* and *tff3* over the period P2 to P9. qRT-PCR data for Tff1, Tff2 and Tff3 was normalized to data obtained for the *rspS23* gene, and standardised to expression levels at P2 using the  $\Delta C_T$  method. Error bars represent SEM of results from  $n = 6$  animals.

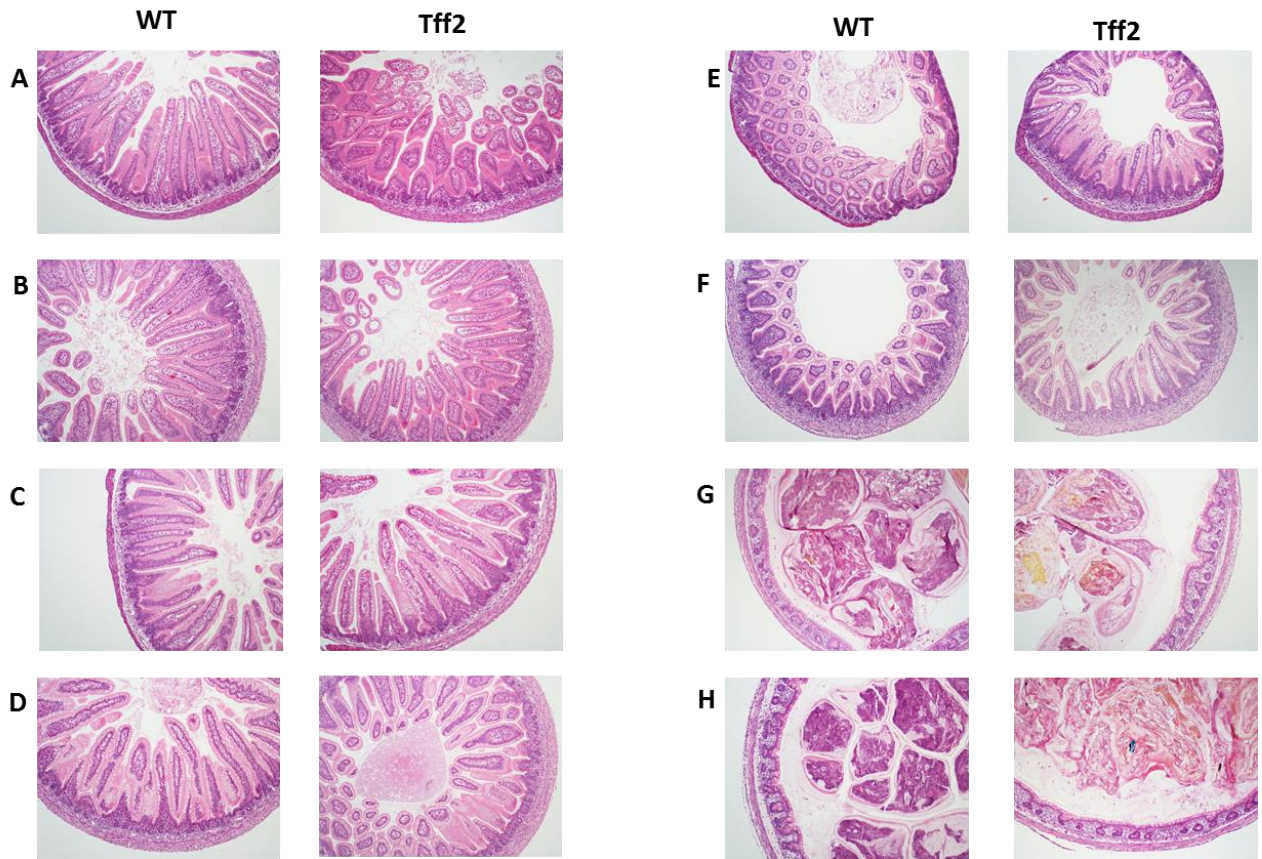

**Fig. S3. Colonization of the P9 gastrointestinal tract of neonatal rats with *E. coli* A192PP does not alter the integrity of the intestinal epithelium in either wildtype (WT) or *tff2*<sup>-/-</sup> homozygotes (Tff2).** Micrographs of H&E-stained sections from tissues removed 48 h after colonization or sham-colonization (broth vehicle alone) of P9 pups: A, sham-colonized PSI; B, A192PP-colonized PSI; C, sham-colonized MSI; D, A192PP-colonized MSI; E, sham-colonized DSI; F, A192PP-colonized DSI; G, sham-colonized distal colon; H, A192PP-colonized distal colon.

| Amplicon       | Forward primer               | Concentration | Reverse primer               | Concentration | Annealing temperature | Efficiency |
|----------------|------------------------------|---------------|------------------------------|---------------|-----------------------|------------|
| <i>rsp23</i>   | TGTGTCAGGGTGCAGCTCATTAAGAACG | 200 µm        | CTTTGCGACCAAATCCAGCAACCAGAAC | 200 µm        | 60°C                  | 97.20%     |
| <i>tff1</i>    | CAAGGTGACCTGTGTCCTC          | 200 µm        | CTTGCTGGTTCTCAATGACC         | 200 µm        | 60°C                  | 99.50%     |
| <i>tff2</i>    | GGCATCACCAGTGACCAGTGCTTTAATC | 200 µm        | GCAGTGCCCTTCAGTAGTGACAATCATC | 200 µm        | 60°C                  | 99.75%     |
| <i>tff3</i>    | ATGGAGACCAGAGCCTTCT          | 200 µm        | GGATGCTGGAGTCAAAACAG         | 200 µm        | 60°C                  | 100.00%    |
| <i>defaRS1</i> | GACCAGGATGTGTTCTGTCTCCTTTG   | 100 µm        | TGTGGACCTTGATAGCCGAATGC      | 100 µm        | 60°C                  | 94.71%     |
| <i>defa24</i>  | TGATGAGCAGCCAGGGAAAGAG       | 400 µm        | TCAGCGGCAACAGAGTATGAGC       | 400 µm        | 60°C                  | 111.00%    |
| <i>TNF-α</i>   | ACTCCAGAAAAGCAAGC AA         | 100 µm        | CGAGCAGGAATGAGAAGAGG         | 100 µm        | 59°C                  | 104.40%    |
| <i>IFN-γ</i>   | ATGAGTGCTACACGCCGCTTGG       | 900 µm        | GAGTTCATTGACAGCTTTGTGCTGG    | 900 µm        | 59°C                  | 113.00%    |

**TABLE S1. Primers used for RT-PCR**
